# MMP-9 Cleaves SP-D and Abrogates Its Innate Immune Functions *In Vitro*

Preston E. Bratcher<sup>1\*</sup>, Nathaniel M. Weathington<sup>2</sup>, Heidi J. Nick<sup>1</sup>, Patricia L. Jackson<sup>1</sup>, Robert J. Snelgrove<sup>3</sup>, Amit Gaggar<sup>1,4,5,6</sup>

**1** Department of Medicine, University of Alabama at Birmingham, Birmingham, Alabama, United States of America, **2** Division of Pulmonary, Allergy, and Critical Care Medicine, Department of Medicine, University of Pittsburgh Medical Center, Pittsburgh, Pennsylvania, United States of America, **3** National Heart and Lung Institute, Imperial College London, London, United Kingdom, **4** Gregory Fleming James Cystic Fibrosis Research Center, University of Alabama at Birmingham, Birmingham, Alabama, United States of America, **5** University of Alabama at Birmingham Lung Health Center, University of Alabama at Birmingham, Birmingham, Alabama, United States of America, **6** Medicine Service, United States Department of Veterans Affairs Medical Center, Birmingham, Alabama, United States of America

## Abstract

Possession of a properly functioning innate immune system in the lung is vital to prevent infections due to the ongoing exposure of the lung to pathogens. While mechanisms of pulmonary innate immunity have been well studied, our knowledge of how these systems are altered in disease states, leading to increased susceptibility to infections, is limited. One innate immune protein in the lung, the pulmonary collectin SP-D, has been shown to be important in innate immune defense, as well as clearance of allergens and apoptotic cells. MMP-9 is a protease with a wide variety of substrates, and has been found to be dysregulated in a myriad of lung diseases ranging from asthma to cystic fibrosis; in many of these conditions, there are decreased levels of SP-D. Our results indicate that MMP-9 is able to cleave SP-D *in vitro* and this cleavage leads to loss of its innate immune functions, including its abilities to aggregate bacteria and increase phagocytosis by mouse alveolar macrophages. However, MMP-9-cleaved SP-D was still detected in a solid-phase *E. coli* LPS-binding assay, while NE-cleaved SP-D was not. In addition, MMP-9 seems to cleave SP-D much more efficiently than NE at physiological levels of calcium. Previous studies have shown that in several diseases, including cystic fibrosis and asthma, patients have increased expression of MMP-9 in the lungs as well as decreased levels of intact SP-D. As patients suffering from many of the diseases in which MMP-9 is over-expressed can be more susceptible to pulmonary infections, it is possible that MMP-9 cleavage of SP-D may contribute to this phenotype.

**Citation:** Bratcher PE, Weathington NM, Nick HJ, Jackson PL, Snelgrove RJ, et al. (2012) MMP-9 Cleaves SP-D and Abrogates Its Innate Immune Functions *In Vitro*. PLoS ONE 7(7): e41881. doi:10.1371/journal.pone.0041881

**Editor:** Charaf Benarafa, University of Bern, Switzerland

**Received:** January 30, 2012; **Accepted:** June 29, 2012; **Published:** July 30, 2012

This is an open-access article, free of all copyright, and may be freely reproduced, distributed, transmitted, modified, built upon, or otherwise used by anyone for any lawful purpose. The work is made available under the Creative Commons CC0 public domain dedication.

**Funding:** This work is supported by the National Institutes of Health (HL102371 to AG, 5T32HL105346-02 to PEB, P30 DK072482), the Cystic Fibrosis Foundation (GAGGAR07 to AG, RDP R464 (pilot to PLJ)), and the Wellcome Trust (WHRL\_P34016 to RJS). The funders had no role in study design, data collection and analysis, decision to publish, or preparation of the manuscript.

**Competing Interests:** The authors have declared that no competing interests exist.

\* E-mail: bratcher@uab.edu

## Introduction

Of the more than twenty matrix metalloproteases, matrix metalloprotease 9 (MMP-9) is one of the most well studied, both *in vitro* and *in vivo*, within the context of normal and several disease states. Also known as 92-kDa gelatinase, or gelatinase B, MMP-9 has a variety of substrates and roles in functions as diverse as tissue remodeling, tissue repair, and regulation of inflammation [1]. More than 30 substrates have been discovered for MMP-9, including gelatin, type IV and V collagens, TNF- $\alpha$ , a variety of surface receptors [including vascular endothelial growth factor receptor-2, beta2-adrenergic receptor, and ICAM-1 (reviewed in [2])], protease nexin-1, interleukin (IL) 8, IL-1 $\beta$ , and leukemia inhibitory factor [3,4,5,6,7]. MMP-9 has a structure similar to other matrix metalloproteases, and includes four domains: an N-terminal signal sequence, a pro-domain region, an active catalytic domain, and a hemopexin-like C-terminal domain (reviewed in [8]). The prodomain region must be cleaved in order for the protein to become active.

Due to its many functions in the body, MMP-9 dysregulation has been implicated in a variety of diseases. MMP-9 expression

and activation levels have been shown to be elevated in lower airway secretions and/or serum of smokers and patients with chronic obstructive pulmonary disorder (COPD), emphysema, idiopathic pulmonary fibrosis (IPF), acute respiratory distress syndrome (ARDS), cystic fibrosis (CF), and asthma after allergen challenge [9,10,11,12,13,14,15,16,17,18,19]. Whilst the role that MMP-9 plays in these conditions is not fully understood, emerging evidence from *in vitro* studies and animal models suggests that MMP-9 may be contributing to the pathogenesis of these disorders rather than being a response to them (reviewed in [1]). An increase in cleavage of various MMP-9 substrates can result in an increase in inflammation *in vitro*, and inflammation *in vivo* results in alterations in clinical outcomes in patients with many of these pulmonary conditions.

MMP-9 expression is also altered during infections by several different pathogens. MMP-9 is increased in bronchoalveolar lavage fluid during hospital-associated pneumonia and *Pseudomonas aeruginosa* infections, in serum during *Mycobacterium tuberculosis* and *Helicobacter pylori* infections, and in cerebrospinal fluid during *Klebsiella pneumoniae* meningitis [20,21,22,23]. Although MMP-9-deficient mice are more susceptible to systemic Streptococcal

infections and *Escherichia coli* peritonitis, the knockouts are less susceptible to pulmonary *Francisella tularensis* and urogenital *Chlamydia muridarum* infections [24,25,26,27]. It is, therefore, likely that MMP-9 has a variety of functions in host immune defense. Interestingly, patients with many of the lung diseases in which MMP-9 levels are elevated are also more susceptible to pulmonary infections, such as in COPD and CF.

One molecule in the lung that also has roles in regulation of inflammation and the innate immune defense is Surfactant Protein D (SP-D) (reviewed in [28,29]). In addition to these roles, SP-D is also involved in surfactant homeostasis. It belongs to the collectin family of pathogen recognition receptors, and its structure consists of two main regions: a collagen-like domain and a carbohydrate recognition (or lectin) domain (CRD). It is able to bind to a variety of pathogens through this CRD. *In vivo*, SP-D is found in homotrimers which are associated through their collagen-like domains, and four homotrimers can further associate to form a cruciform-like dodecamer. It is through this multimerization that SP-D is able to cause the formation of aggregates of pathogens and allergens (reviewed in [30]).

Similar to MMP-9, SP-D is thought to be involved in the mechanism behind the pathology of many pulmonary diseases, including asthma, smoking-associated respiratory problems, COPD, IPF, and cystic fibrosis. The concentration of SP-D is increased in the serum of COPD, IPF, and CF patients, increased in the lungs of asthmatics after allergen challenge, and decreased in the lungs of smokers [31,32,33,34,35,36]. Its roles in these diseases are likely due to its functions in surfactant homeostasis as well as regulation of inflammation. SP-D has also been found to be important in the pulmonary defense against many pathogens, and is able to directly interact with viruses, fungi, and bacteria (reviewed in [30]). SP-D knockout mice have been shown to be more susceptible to respiratory infections with *Streptococcus pneumoniae*, *Pseudomonas aeruginosa*, *Pneumocystis carinii*, *Influenza A* virus, Respiratory syncytial virus, and *Aspergillus fumigatus* [37,38,39,40,41,42].

Due to the overlap of alterations in MMP-9 and SP-D in pulmonary diseases and infections, we sought to examine the effects that MMP-9 has upon SP-D *in vitro*. We hypothesized that SP-D may serve as a substrate for MMP-9 as SP-D contains a collagen-like region and MMP-9 has the ability to cleave collagen. Experiments were performed to examine interactions between purified recombinant proteins, and several *in vitro* assays demonstrate the ability of MMP-9 to abrogate the innate immune functions of SP-D.

## Results

### MMP-9 Cleaves SP-D

To determine if SP-D could be cleaved by MMP-9, recombinant MMP-9 and recombinant SP-D were incubated together at 37°C. Intact recombinant SP-D monomers were detected as a ~43 kDa band using SDS-PAGE under reducing conditions (with minor ~27 and ~23 kDa bands). Incubation with MMP-9 led to the formation of two prominent bands at ~23 and ~17 kDa (Figure 1). The relative amount of the ~23 kDa band and the presence and relative amount of the ~17 kDa band were both dependent on dose of MMP-9 and the time of incubation. Based on the dose curve (Figure 1A), 20 µg/mL of SP-D was incubated with 5 µg/mL of MMP-9, which resulted in the formation of the 23 and 17 kDa fragments after only one minute. After four hours, all of the SP-D detected had been degraded from its intact, 43 kDa form into the smaller fragments. In addition, after extensive cleavage, the 23 kDa band decreased in intensity relative to the

17 kDa band, suggesting that the 23 kDa fragment may be further digested by MMP-9 (Figure 1B). In order to further analyze the effect of cleavage on the structure of SP-D, we examined intact and cleaved SP-D using Native PAGE (Figure 1C). The results reveal that there is a significant alteration of the multimeric structure of SP-D after incubation with MMP-9, as changes in the banding patterns were observed.

### SP-D-mediated Bacterial Aggregation is Disrupted by MMP-9 Cleavage

Incubation with SP-D *in vitro* results in the agglutination of a variety of pathogens, including *E. coli* [30]. In order to examine the effects of cleavage by MMP-9 on this function, we incubated *E. coli* with intact and cleaved SP-D (Figure 2). While incubation with intact SP-D led to the formation of aggregates of *E. coli*, incubation with cleaved SP-D or PBS had no visual effect upon the *E. coli* (Figure 2A–C). Incubation with MMP-9 alone also had no visual effect (not shown). In order to confirm these results in a more quantitative matter, we monitored the optical density (OD) of suspensions of *E. coli* with or without intact and cleaved SP-D, and only observed a decline in OD with intact SP-D (Figure 2D). Because multimerization of SP-D is necessary for the formation of bacterial aggregates after the CRD-mediated interaction of SP-D with the bacteria, we hypothesize that cleaved SP-D no longer agglutinates bacteria due to the fact that the multimers are disrupted.

### Loss of the Ability of SP-D to Increase Phagocytosis of *E. coli* by Alveolar Macrophages after MMP-9 Cleavage

In addition to agglutination, we also examined the ability of SP-D to serve as an opsonin for clearance of bound pathogens by host cells. For our *in vitro* model, we used a mouse alveolar macrophage cell line (MH-S). By adding *E. coli* preincubated with SP-D to these macrophages, we saw a dose-dependent increase in bacterial phagocytosis using a gentamicin protection assay (Figure 3A). After cleavage with MMP-9, the opsonic activity of SP-D was completely abrogated, and phagocytosis was decreased to levels comparable with the MMP-9 alone control. In addition to the gentamicin protection assay, we also used microscopy and flow cytometry to examine SP-D's impact on phagocytosis of FITC-labeled *E. coli* (Figure 3B, C, and D). Results from these analyses confirmed those obtained using the gentamicin protection assay, demonstrating a striking loss of SP-D's opsonic capacity following MMP-9 cleavage. Interestingly, the microscopy and flow cytometry results suggest that while the numbers of macrophages containing bacteria are very similar, those that do phagocytose bacteria contain more in the presence of intact SP-D.

### MMP-9–cleaved SP-D Retains CRD-dependent Binding to LPS

In order to determine if the CRD of the fragmented SP-D retains its ability to bind to target molecules, we performed an ELISA using LPS-coated plates. Detection of both intact and cleaved SP-D was dose-dependent, suggesting that the cleaved SP-D was able to bind to LPS (Figure 4A). Although intact and cleaved SP-D were assayed at 1 µg/mL (Fig. 4B), there was a fivefold lower amount of MMP-9-cleaved SP-D detected; binding was completely abrogated by the addition of maltose, suggesting that this binding occurred through the CRD and that the CRD remained intact after cleavage by MMP-9. The decrease in the amount of SP-D detected when MMP-9-cleaved SP-D was assayed may be due to the fact that intact SP-D molecules are larger, and may bind more of the polyclonal antibody than the

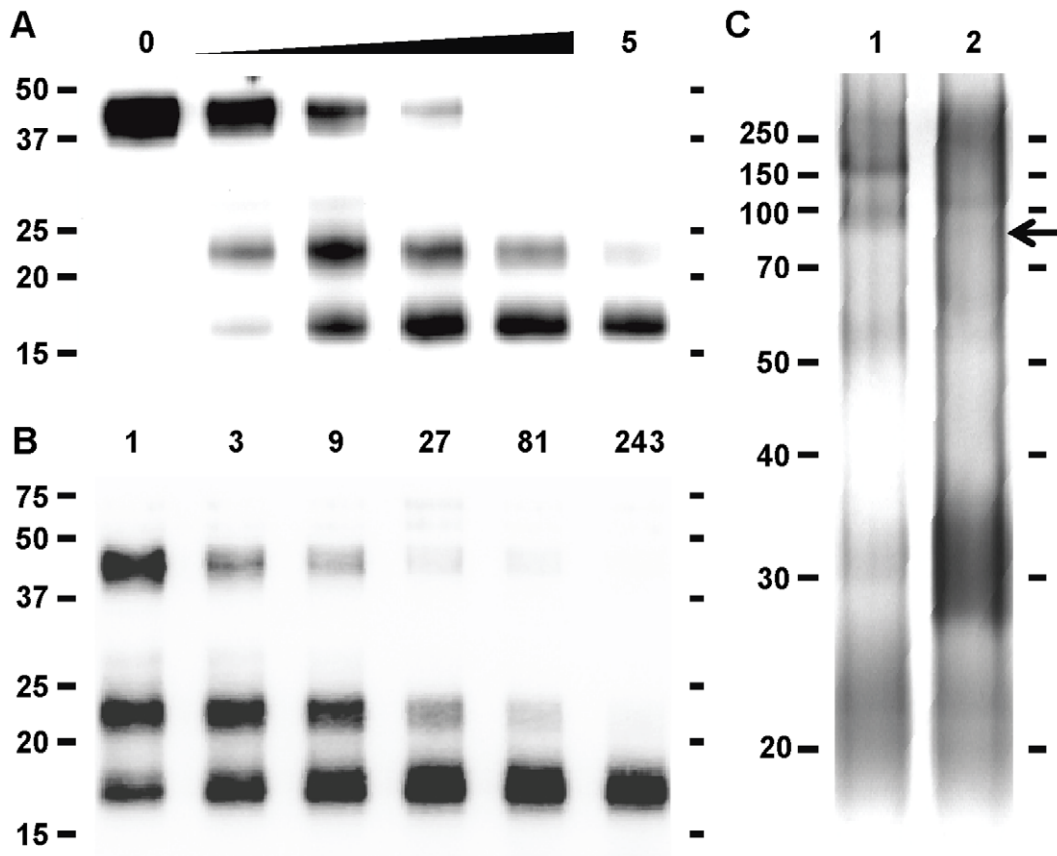

**Figure 1. MMP-9 Cleaves SP-D in a Dose- and Time-dependent Manner.** (A) Dose and (B) time course digestions of SP-D by MMP-9. For the dose course (A), the reaction loaded onto lane 2 contained 62 ng/mL MMP-9 and the concentration was raised 3-fold serially to 5  $\mu$ g/mL MMP-9 at lane 6. Reactions were incubated for 4 hours. For the time course (B), the length of digestion in minutes is listed above the lane. SP-D concentration was 20  $\mu$ g/mL for both experiments, and MMP-9 concentration was 5  $\mu$ g/mL for the time course. For the Native PAGE (C), lane 1 contains intact SP-D and lane 2 contains cleaved SP-D. An arrow indicates the band corresponding to MMP-9.  
doi:10.1371/journal.pone.0041881.g001

cleavage fragment containing the CRD; however, it possible that the cleavage may alter the ability of SP-D to bind LPS or the stability of this interaction. In contrast to MMP-9-cleaved SP-D, binding of NE-cleaved SP-D was not detected in this ELISA; this lack of CRD binding to carbohydrates by NE-cleaved SP-D has been previously shown by others [43]. This highlights differences in properties of the cleavage fragments generated by MMP-9 and NE. We additionally assayed for binding to plates coated with 5% BSA to control for SP-D binding to the blocking substance; although both intact and MMP-9-cleaved SP-D were detected, they were detected at levels significantly lower than that with LPS-coated plates ( $p < 0.02$  for intact and  $p < 0.05$  for MMP-9-cleaved, data not shown). These results indicate that both intact and MMP-9-cleaved SP-D seem able to bind to *E. coli* LPS, and this binding was inhibited by maltose, suggesting it occurs through the CRD.

#### MMP-9 Cleaves SP-D more Efficiently than Neutrophil Elastase at Physiological Calcium Concentrations

Cleavage of SP-D by several serine proteases and Pseudomonas elastase has previously been well-described [43,44,45]. A study by Cooley et al. showed that of the serine proteases that cleave SP-D (which consist of neutrophil elastase (NE), cathepsin G, and proteinase-3), NE is the most potent [46]. However, several studies have reported that both the cleavage pattern and efficiency of cleavage by these serine proteases is dependent on the concentra-

tion of calcium [43,46,47]. As we did not expect calcium concentration to affect cleavage by MMP-9, we compared MMP-9 cleavage to NE cleavage of SP-D at a variety of calcium concentrations. As shown in Figure 5, while at low calcium levels of 0.19 mM, MMP-9 and NE cleave at comparable rates. But at 0.9 mM (the concentration used for all other experiments in this paper), MMP-9 is much more potent at cleaving SP-D. Cleavage of SP-D at physiological levels of calcium (2 mM) was similar to cleavage at 0.9 mM. Therefore, MMP-9 may play a more important role than serine proteases in regulation of SP-D function *in vivo*.

#### Discussion

The data presented in this manuscript demonstrate the ability of a single protease, MMP-9, to regulate cleavage of an important innate immune regulatory molecule of the lung. Dose-dependent cleavage of SP-D by MMP-9 using levels of protein similar to that observed in patients with chronic lung disease (Figure 1) suggests *in vivo* relevance for this cleavage event. In addition, we demonstrate that this effect renders alterations in multimeric assembly (Figure 1C), and cleavage causes SP-D to no longer be able to agglutinate bacteria (Figure 2). This cleavage further affects SP-D's innate immune functions, as bacteria are no longer efficiently phagocytosed by alveolar macrophages *in vitro* (Figure 3).

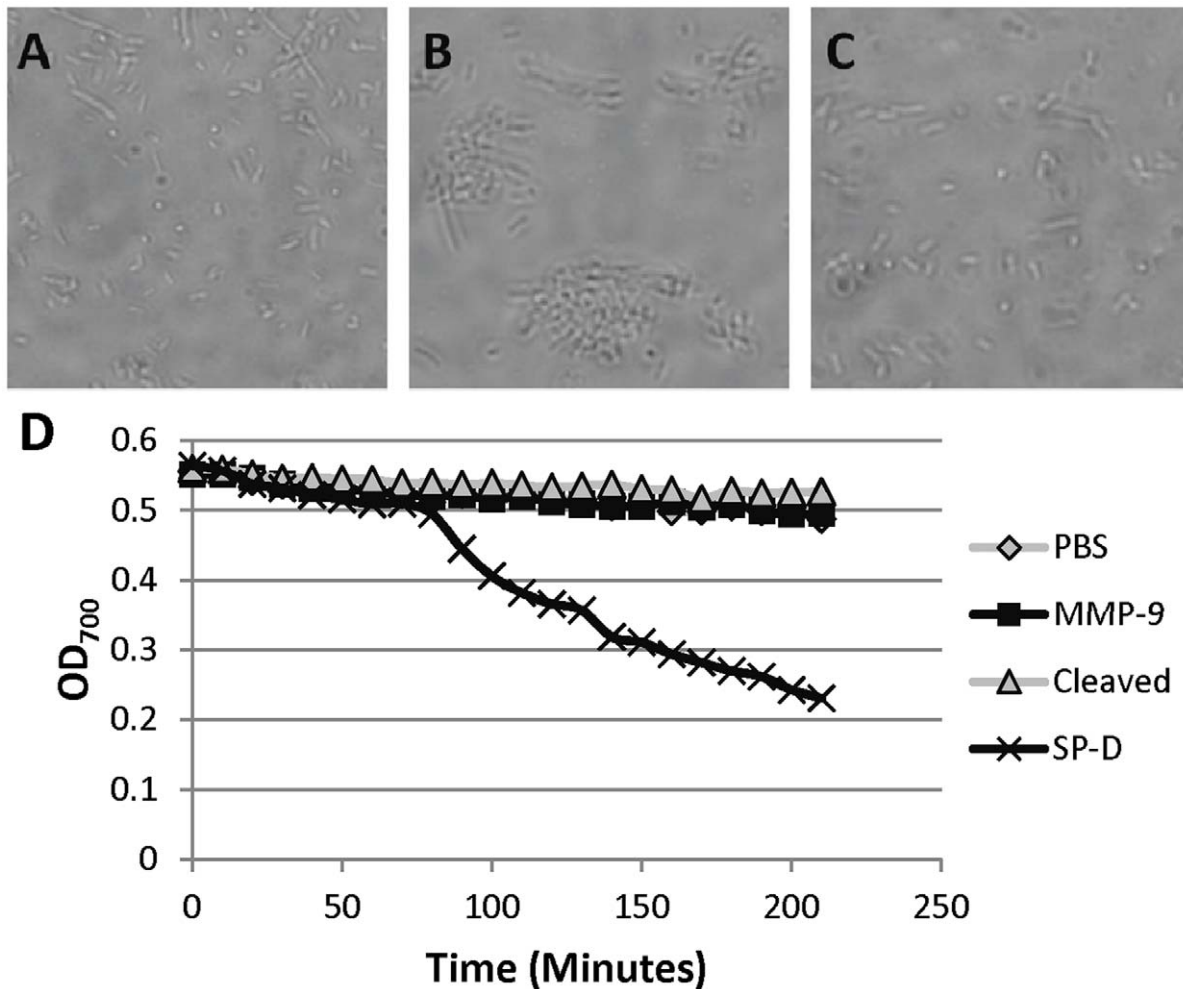

**Figure 2. Cleaved SP-D Fails to Agglutinate *E. coli*.** An equal volume of concentrated bacteria and (A) PBS, (B) 1  $\mu\text{g}/\text{mL}$  intact SP-D, or (C) 1  $\mu\text{g}/\text{mL}$  cleaved SP-D were mixed and examined using brightfield microscopy. Original magnification was 1000X. (D) Agglutination was quantitated using by monitoring the OD<sub>700</sub> over time as previously described [50]. doi:10.1371/journal.pone.0041881.g002

The finding that MMP-9 is able to cleave SP-D and abrogate several of its functions *in vitro* suggests an additional role of MMP-9 over-expression in disease. The interesting links that exist between these two molecules in human disease and the data presented here demonstrating their interaction suggests that the effects we saw *in vitro* may also occur in human disease. Although we only explored alterations in the innate immune functions of SP-D, these alterations could provide a potential mechanism for the increase in susceptibility to infections in COPD and CF patients. In addition, recent data has suggested the possibility of whole SP-D regulating MMP-9 release from alveolar macrophages, suggesting a potential “feed-forward” loop [48]. Whether or not MMP-9 cleaved SP-D may regulate release from alveolar macrophages is a question for further investigation.

Although previous studies have shown that several serine proteases are able to cleave SP-D, their shared cleavage site is in the CRD, and this cleavage renders SP-D unable to bind targets through its CRD [43,44]. Contrary to this, cleavage by MMP-9 does not seem to alter CRD function (Figure 4). Therefore, the SP-D fragments produced by proteolytic cleavage may still have functions in the host, and these functions might depend on which protease produced them. Even though MMP-9 cleaved SP-D is still able to bind to carbohydrates, the overall results strongly

suggest that intact, multimeric SP-D is required for optimal host-pathogen interactions.

In addition to differences in properties of the fragments produced, efficiency of cleavage is also different between serine proteases and MMP-9. While cleavage of SP-D by serine proteases is dependent on calcium concentration, cleavage by MMP-9 is unaffected by calcium. At higher concentrations of calcium, MMP-9 cleaves SP-D much more effectively than NE (Figure 5), which is the most potent serine protease for SP-D cleavage [46]. As these higher concentrations also represent physiological levels, MMP-9 may contribute as much to SP-D fragmentation *in vivo* as the serine proteases. Interestingly, the CRD of SP-D requires calcium in order to bind to carbohydrates, so in the low calcium environment at which serine proteases cleave SP-D most efficiently, the calcium might not be at optimal levels for CRD interactions with carbohydrate targets.

It is quite possible that the active cleavage of SP-D will render a novel mechanism for the pathogenesis in diseases like asthma, emphysema, and allergies, in which MMP-9 is over-expressed. A critical component of the impact of these findings in clinical disorder is to determine the extent of SP-D cleavage and dysfunction in these conditions; the use of important biomarkers reflecting this cleavage (such as determination of the amino acid

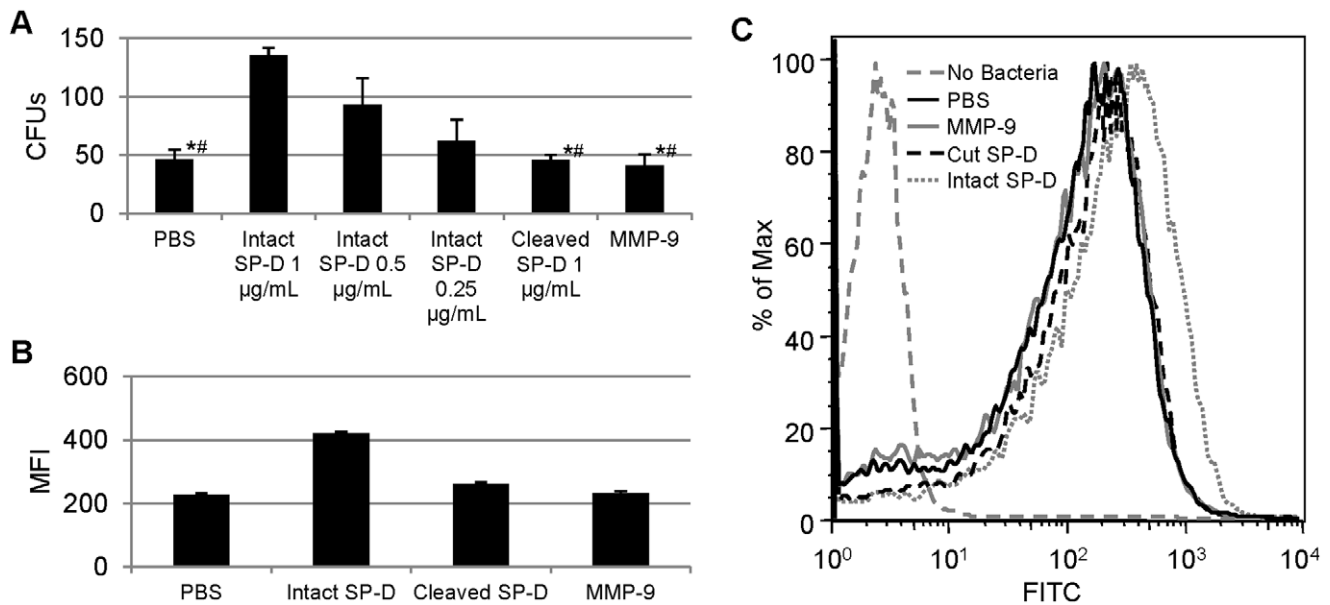

**Figure 3. Cleaved SP-D Fails to Increase Phagocytosis by MH-S Cells.** Examination and quantitation of phagocytosis of *E. coli* by MH-S cells was performed using (A) a gentamicin protection assay and (B and C) flow cytometry. For (A), all conditions are significantly different ( $p < 0.05$ ) from 1  $\mu\text{g/mL}$  intact SP-D. An asterisk (\*) denotes  $p \leq 0.001$  when compared to 1  $\mu\text{g/mL}$  intact SP-D. Columns marked with # are significantly different when compared to 0.5  $\mu\text{g/mL}$  intact SP-D ( $p < 0.05$ ). For (B), intact SP-D causes MH-S cells to have significantly higher mean fluorescence intensity (MFI) than all other conditions ( $p \leq 0.001$ ). Cleaved SP-D is significantly different when compared to both MMP-9 and PBS controls ( $p \leq 0.001$ ). For (C), flow data was gated on forward and side scatter to select for MH-S cells. For both (A) and (B), error bars represent standard deviation. doi:10.1371/journal.pone.0041881.g003

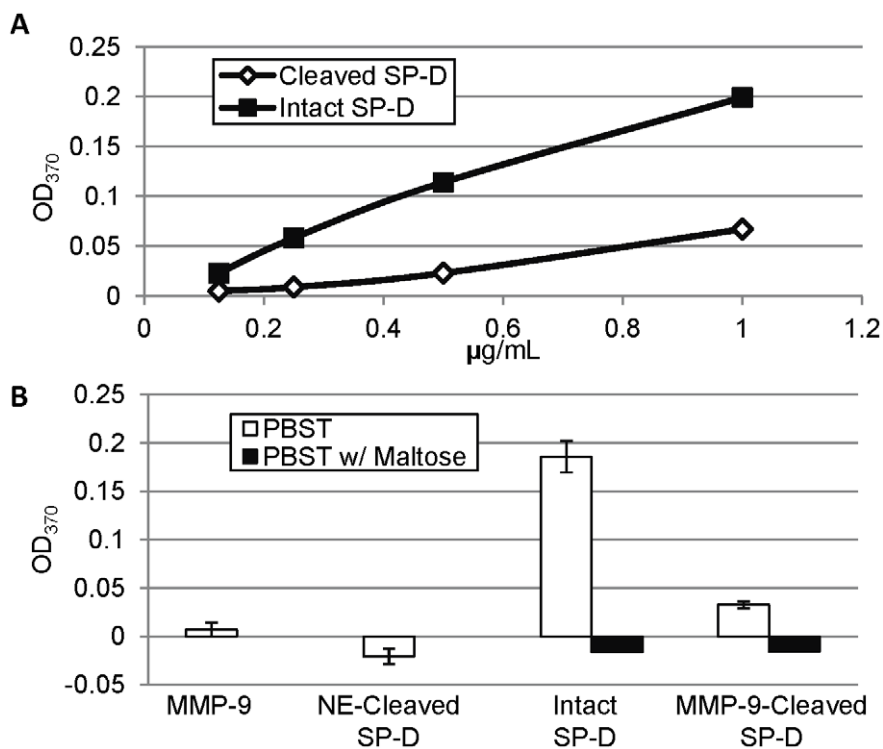

**Figure 4. Cleaved SP-D Retains its Ability to Bind *E. coli* LPS.** Examination of the ability of SP-D to bind to LPS-coated plates. In (A), the ELISA was performed using 2-fold serially diluted SP-D samples. In (B), 1  $\mu\text{g/mL}$  intact or cleaved SP-D was analyzed in triplicate with MMP-9 as a control and NE-cleaved SP-D as a negative control. The average of PBST alone ran in triplicate was subtracted from all values. While intact and MMP-9-cleaved SP-D in PBST are significantly different from PBST alone ( $p \leq 0.001$  and  $p < 0.05$ , respectively) and NE-cleaved SP-D ( $p \leq 0.001$  and  $p < 0.05$ , respectively), MMP-9 along with intact and cleaved SP-D in PBST with maltose were not significantly different from PBST or PBST with maltose. For (B), error bars represent standard deviation. doi:10.1371/journal.pone.0041881.g004

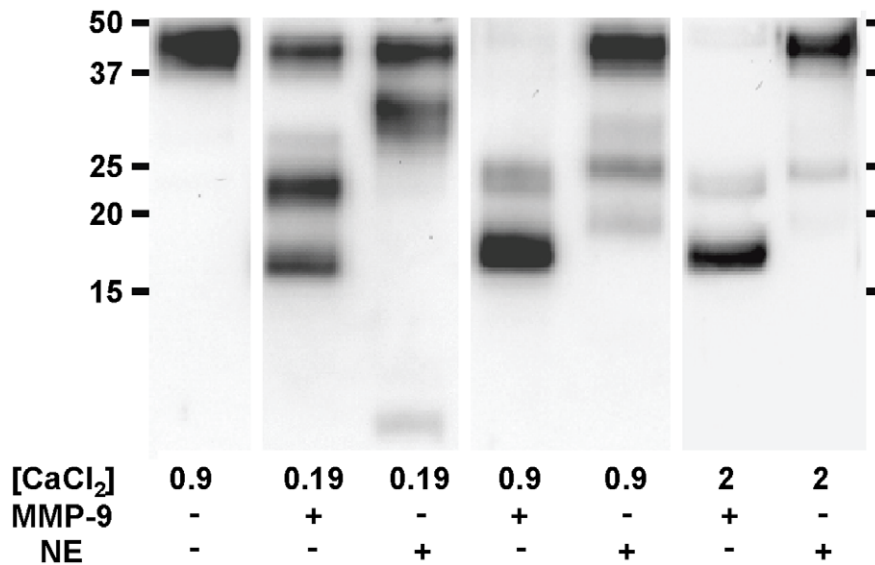

**Figure 5. MMP-9 cleaves SP-D more potently than NE at higher calcium concentrations.** Comparison of the fragments produced by cleavage with SP-D and NE. CaCl<sub>2</sub> concentrations are listed in mM. For experiments at 0.19 mM CaCl<sub>2</sub>, incubations were carried out for 10 min at protease concentrations of 16.95 nM. For experiments at 0.9 and 2 mM CaCl<sub>2</sub>, incubations were carried out for 4 hours with or without protease at 60.24 nM.

doi:10.1371/journal.pone.0041881.g005

cleavage fragments from lower airway secretions via mass spectrometry) may be a mechanism by which to track the loss of the intact SP-D in disease.

The potential impact of MMP-9 mediated proteolysis of SP-D may also have broad implications to the cleavage of other collectin molecules. For example SP-A, another prominent innate immune molecule, shares significant structural similarity to SP-D and may also be cleaved and inactivated by MMP-9 [30]. Identifying similarities and potential differences in the functionality of these proteins after proteolytic digestion may offer us additional insight into the roles of these collectins in human lung disorders with a protease-rich environment.

If MMP-9-mediated proteolytic loss of SP-D does indeed contribute to disease pathogenesis in clinical disease, there are potential therapeutic directions by which to target these losses of SP-D *in vivo*. One possibility is to neutralize MMP-9 with specific synthetic inhibitors or the use of endogenous antiproteases; potential questions certainly exist about tolerability and routes of delivery of these compounds [49]. If a specific cleavage site could be determined for MMP-9 cleavage of SP-D, it could be possible to mutate the cleavage site and create an MMP-9 resistant recombinant SP-D to be delivered exogenously to patients. Such a therapeutic might offer a targeted mechanism to improve bacterial clearance and regulation of lung host defense in the diseased airway.

## Materials and Methods

### Bacteria and Macrophages

MH-S cells (ATCC, Manassas, VA, USA) were maintained in RPMI 1640 (HyClone Laboratories, Logan, Utah, USA) with 10% FBS (Atlanta Biologicals, Lawrenceville, GA, USA) and 1% Penicillin-Streptomycin Solution (Mediatech, Manassas, VA, USA).

*E. coli* DH5 $\alpha$  was grown until saturation in LB broth (Becton, Dickinson, and Company, Sparks, MD, USA) at 37°C with

shaking. Stocks were made by adding glycerol and storing at -80°C.

### Cleavage of SP-D by MMP-9

Recombinant human SP-D (R&D Systems, Minneapolis, MN, USA) was diluted in DPBS with magnesium and calcium (HyClone, Logan, UT, USA) to a concentration of 20  $\mu$ g/mL. Recombinant active human MMP-9 (Calbiochem, San Diego, CA, USA) was diluted in DPBS with Mg<sup>2+</sup> and Ca<sup>2+</sup>. Cleavage reactions were carried out at 37°C. For the time course of MMP-9 digestion, reactions were stopped by adding an equal volume of 5XSDS-PAGE Sample Buffer and boiling for 5 min. For generation of fragments for use in agglutination and phagocytosis assays, the SP-D concentration was 20  $\mu$ g/mL and MMP-9 was 5  $\mu$ g/mL and cleavage was allowed to proceed for 4 hours and was confirmed by western blot.

### Cleavage of SP-D by NE

Cleavage of SP-D by neutrophil elastase was performed as for MMP-9. Purified NE (Enzo Life Sciences, Farmingdale, NY, USA) was incubated with 20  $\mu$ g/mL of recombinant SP-D at 37°C. For generation of fragments for use in the ELISA, 10  $\mu$ g/mL NE was incubated with 20  $\mu$ g/mL SP-D for 1 hour at 37°C. After cleavage, a portion was analyzed by Western Blot to ensure complete cleavage of intact SP-D (data not shown).

### Western Blots

SP-D digest reactions were analyzed by SDS-PAGE under reducing conditions using 15% acrylamide gels. After transfer to a nitrocellulose membrane, blots were blocked with 5% milk, then incubated with a polyclonal antibody against SP-D diluted 1:2,000 (R&D Systems, Minneapolis, MN, USA) for one hour at 37°C. Blots were then washed, and a 1:30,000 dilution of anti-goat-HRP antibody was added (Abcam, Cambridge, UK) for one hour at 37°C. The blots were developed using Supersignal West Femto (Thermo, Waltham, MA, USA) and imaged using a ChemiDoc XRS (BioRad, Hercules, CA, USA).

## Native PAGE

SP-D was analyzed by native PAGE using Any KD Mini-PROTEAN TGX Gels (BioRad, Hercules, CA, USA). 0.5  $\mu\text{g}$  of either intact or cleaved SP-D was mixed with RunBlue Native Sample Buffer (Expedeon, San Diego, CA) and electrophoresed in Tris-Glycine buffer. Protein was visualized using Pierce Silver Stain Kit (Thermo, Waltham, MA, USA).

## Agglutination

Frozen *E. coli* was thawed, washed, and resuspended in 1/5 original volume of DPBS with  $\text{Mg}^{2+}$  and  $\text{Ca}^{2+}$ . 3.5  $\mu\text{L}$  of concentrated bacteria was added to 3.5  $\mu\text{L}$  of intact or cleaved SP-D at 2  $\mu\text{g}/\text{mL}$  diluted in DPBS with  $\text{Mg}^{2+}$  and  $\text{Ca}^{2+}$ , MMP-9 diluted in DPBS with  $\text{Mg}^{2+}$  and  $\text{Ca}^{2+}$  (not shown), or DPBS alone on a glass slide and coverslip was added. Pictures were taken 5–10 minutes after mixing.

For quantitative analysis, the  $\text{OD}_{700}$  of bacterial suspensions was monitored over time as previously described [50]. Frozen *E. coli* was thawed, washed and resuspended in PBS with intact SP-D, cleaved SP-D, or MMP-9 at an  $\text{OD}_{700}$  of  $\sim 0.5$ . Measurements were taken every 10 minutes.

## Phagocytosis Assay

$1 \times 10^5$  MH-S cells per well were seeded in a 96-well plate and incubated overnight in a humid incubator at  $37^\circ\text{C}$  with 5%  $\text{CO}_2$ . Bacteria were thawed, washed with HBSS (Mediatech, Manassas, VA, USA), and diluted to  $1 \times 10^7$  CFU/mL. SP-D was added to bacteria at a final concentration of 1  $\mu\text{g}/\text{mL}$  and allowed to incubate at  $37^\circ\text{C}$  for 30 min. After washing the MH-S cells three times in assay buffer (5% FBS in HBSS), 100  $\mu\text{L}$  of bacteria, bacteria with intact or cleaved SP-D, or bacteria with MMP-9 was added to wells and incubated at  $37^\circ\text{C}$  for 45 min. MH-S cells were washed three times and 150  $\mu\text{L}$  of 2 mg/mL gentamicin sulfate was added. The plate was incubated at  $37^\circ\text{C}$  for 15 min, washed three times, then 100  $\mu\text{L}$  of  $\text{dH}_2\text{O}$  was added. After 15 minutes, the lysate was mixed by thorough pipetting, and 10  $\mu\text{L}$  was plated on LB agar. Agar plates were incubated overnight at  $37^\circ\text{C}$  and CFU counts were performed the following day.

## Fluorescence Microscopy and Flow Cytometry

*E. coli* was FITC labeled by using a modification of a previously reported protocol [51]. FITC Isomer I (Sigma, St. Louis, MO, USA) labeling solution was prepared in 0.1 M carbonate/bicarbonate buffer (pH = 9.5) at 0.03%. *E. coli* frozen stocks were thawed, washed with HBSS, then resuspended in twice their original volume of FITC labeling solution and incubated for 20

minutes at room temperature. Bacteria were washed three times, then resuspended in half their original volume of assay buffer (HBSS with 5% FBS). FITC-labeled bacteria were used in the phagocytosis assay described above, except that after washing unattached bacteria from the macrophages, cells were trypsinized, washed, and resuspended in a small amount of assay buffer ( $\sim 50 \mu\text{L}$ ). For flow cytometry, MH-S cells from three wells that were given the same treatment were combined. Intact or cleaved SP-D was used in the assay at a final concentration of 1  $\mu\text{g}/\text{mL}$ .

## ELISA

Purified *E. coli* K12 LPS (InvivoGen, San Diego, CA, USA) was diluted to 1  $\mu\text{g}/\text{mL}$  and incubated in a 96-well E.I.A. plate at  $4^\circ\text{C}$  overnight (Costar, Cambridge, MA, USA). The plates were then washed 3 times using PBS with 0.1% Tween-20 (PBST), and then blocked with 5% BSA in PBS for 1 hour at  $37^\circ\text{C}$ . After washing 3 times, plates were incubated for 1 hour at  $37^\circ\text{C}$  with samples diluted 20-fold in PBST with or without 250 mM maltose. Plates were washed three times, then incubated sequentially for 2 hours at  $37^\circ\text{C}$  with the same primary and secondary antibodies used in the western blots described above diluted at 1:200 and 1:20,000, respectively. Plates were washed between antibody incubations and afterwards, then developed with TMB substrate (Sigma, St. Louis, MO, USA) for 1 hour and  $\text{OD}_{370}$  was measured on a Benchmark Plus microplate spectrophotometer (BioRad, Hercules, CA, USA).

## Statistics

All samples were run in triplicate, and results shown are representative of at least 3 independent experiments. Descriptive statistics (mean+ SD) were compared using One-Way ANOVA with Tukey's post-hoc test. All statistical tests were performed at a 5% significance level (i.e.,  $\alpha = 0.05$ ) using GraphPad Prism (La Jolla, CA).

## Acknowledgments

We would like to acknowledge Dr. J.E. Blalock, Dr. T. Szul, Dr. Xin Xu, and Dr. M.T. Hardison for their careful reading and critical evaluation of this manuscript.

## Author Contributions

Conceived and designed the experiments: PEB NMW RJS AG. Performed the experiments: PEB NMW HJN. Analyzed the data: PEB NMW AG. Contributed reagents/materials/analysis tools: HJN PLJ AG. Wrote the paper: PEB AG.

## References

- Atkinson JJ, Senior RM (2003) Matrix metalloproteinase-9 in lung remodeling. *Am J Respir Cell Mol Biol* 28: 12–24.
- Cauwe B, Van den Steen PE, Opdenakker G (2007) The biochemical, biological, and pathological kaleidoscope of cell surface substrates processed by matrix metalloproteinases. *Crit Rev Biochem Mol Biol* 42: 113–185.
- Van den Steen PE, Proost P, Wuyts A, Van Damme J, Opdenakker G (2000) Neutrophil gelatinase B potentiates interleukin-8 tenfold by aminoterminal processing, whereas it degrades CTAP-III, PF-4, and GRO-alpha and leaves RANTES and MCP-2 intact. *Blood* 96: 2673–2681.
- Xu D, Suenaga N, Edelmann MJ, Fridman R, Muschel RJ, et al. (2008) Novel MMP-9 substrates in cancer cells revealed by a label-free quantitative proteomics approach. *Mol Cell Proteomics* 7: 2215–2228.
- Ito A, Mukaiyama A, Itoh Y, Nagase H, Thogersen IB, et al. (1996) Degradation of interleukin 1beta by matrix metalloproteinases. *J Biol Chem* 271: 14657–14660.
- Hibbs MS, Hasty KA, Seyer JM, Kang AH, Mainardi CL (1985) Biochemical and immunological characterization of the secreted forms of human neutrophil gelatinase. *J Biol Chem* 260: 2493–2500.
- Mohan MJ, Seaton T, Mitchell J, Howe A, Blackburn K, et al. (2002) The tumor necrosis factor-alpha converting enzyme (TACE): a unique metalloproteinase with highly defined substrate selectivity. *Biochemistry* 41: 9462–9469.
- Visse R, Nagase H (2003) Matrix metalloproteinases and tissue inhibitors of metalloproteinases: structure, function, and biochemistry. *Circ Res* 92: 827–839.
- Louhelainen N, Stark H, Mazur W, Rytala P, Djukanovic R, et al. (2010) Elevation of sputum matrix metalloproteinase-9 persists up to 6 months after smoking cessation: a research study. *BMC Pulm Med* 10: 13.
- Higashimoto Y, Iwata T, Okada M, Satoh H, Fukuda K, et al. (2009) Serum biomarkers as predictors of lung function decline in chronic obstructive pulmonary disease. *Respir Med* 103: 1231–1238.
- Bech KM, Beier J, Kornmann O, Buhl R (2003) Sputum matrix metalloproteinase-9, tissue inhibitor of metalloproteinase-1, and their molar ratio in patients with chronic obstructive pulmonary disease, idiopathic pulmonary fibrosis and healthy subjects. *Respir Med* 97: 634–639.
- Boulay ME, Prince P, Deschesnes F, Chakir J, Boulet LP (2004) Metalloproteinase-9 in induced sputum correlates with the severity of the late allergen-induced asthmatic response. *Respiration* 71: 216–224.

13. Oshita Y, Koga T, Kamimura T, Matsuo K, Rikimaru T, et al. (2003) Increased circulating 92 kDa matrix metalloproteinase (MMP-9) activity in exacerbations of asthma. *Thorax* 58: 757–760.
14. Cataldo DD, Bettiol J, Noel A, Bartsch P, Foidart JM, et al. (2002) Matrix metalloproteinase-9, but not tissue inhibitor of matrix metalloproteinase-1, increases in the sputum from allergic asthmatic patients after allergen challenge. *Chest* 122: 1553–1559.
15. Boschetto P, Quintavalle S, Zeni E, Leprotti S, Potena A, et al. (2006) Association between markers of emphysema and more severe chronic obstructive pulmonary disease. *Thorax* 61: 1037–1042.
16. Henry MT, McMahon K, Mackarel AJ, Prikk K, Sorsa T, et al. (2002) Matrix metalloproteinases and tissue inhibitor of metalloproteinase-1 in sarcoidosis and IPF. *Eur Respir J* 20: 1220–1227.
17. Gaggari A, Li Y, Weathington N, Winkler M, Kong M, et al. (2007) Matrix metalloproteinase-9 dysregulation in lower airway secretions of cystic fibrosis patients. *Am J Physiol Lung Cell Mol Physiol* 293: L96–L104.
18. Roderfeld M, Rath T, Schulz R, Seeger W, Tschuschner A, et al. (2009) Serum matrix metalloproteinases in adult CF patients: Relation to pulmonary exacerbation. *J Cyst Fibros* 8: 338–347.
19. Lanchou J, Corbel M, Tanguy M, Germain N, Boichot E, et al. (2003) Imbalance between matrix metalloproteinases (MMP-9 and MMP-2) and tissue inhibitors of metalloproteinases (TIMP-1 and TIMP-2) in acute respiratory distress syndrome patients. *Crit Care Med* 31: 536–542.
20. El-Solh AA, Amsterdam D, Alhajhusain A, Akinnusi ME, Saliba RG, et al. (2009) Matrix metalloproteinases in bronchoalveolar lavage fluid of patients with type III *Pseudomonas aeruginosa* pneumonia. *J Infect* 59: 49–55.
21. Hrabec E, Strek M, Zieba M, Kwiatkowska S, Hrabec Z (2002) Circulation level of matrix metalloproteinase-9 is correlated with disease severity in tuberculosis patients. *Int J Tuberc Lung Dis* 6: 713–719.
22. Bergin PJ, Anders E, Sicheng W, Erik J, Jennic A, et al. (2004) Increased production of matrix metalloproteinases in *Helicobacter pylori*-associated human gastritis. *Helicobacter* 9: 201–210.
23. Tsai HC, Liu SF, Wu KS, Liu YC, Shi MH, et al. (2008) Dynamic changes of matrix metalloproteinase-9 in patients with *Klebsiella pneumoniae* meningitis. *Inflammation* 31: 247–253.
24. Bottcher T, Spreer A, Azei I, Nau R, Gerber J (2003) Matrix metalloproteinase-9 deficiency impairs host defense mechanisms against *Streptococcus pneumoniae* in a mouse model of bacterial meningitis. *Neurosci Lett* 338: 201–204.
25. Renckens R, Roelofs JJ, Florquin S, de Vos AF, Lijnen HR, et al. (2006) Matrix metalloproteinase-9 deficiency impairs host defense against abdominal sepsis. *J Immunol* 176: 3735–3741.
26. Malik M, Bakshi CS, McCabe K, Catlett SV, Shah A, et al. (2007) Matrix metalloproteinase 9 activity enhances host susceptibility to pulmonary infection with type A and B strains of *Francisella tularensis*. *J Immunol* 178: 1013–1020.
27. Imtiaz MT, Distelhorst JT, Schripsema JH, Sigar IM, Kasimos JN, et al. (2007) A role for matrix metalloproteinase-9 in pathogenesis of urogenital *Chlamydia muridarum* infection in mice. *Microbes Infect* 9: 1561–1566.
28. Hart D, Griese M (2006) Surfactant protein D in human lung diseases. *Eur J Clin Invest* 36: 423–435.
29. Kingma PS, Whitsett JA (2006) In defense of the lung: surfactant protein A and surfactant protein D. *Curr Opin Pharmacol* 6: 277–283.
30. Kishore U, Greenhough TJ, Waters P, Shrive AK, Ghai R, et al. (2006) Surfactant proteins SP-A and SP-D: structure, function and receptors. *Mol Immunol* 43: 1293–1315.
31. Erpenbeck VJ, Schmidt R, Gunther A, Krug N, Hohlfeld JM (2006) Surfactant protein levels in bronchoalveolar lavage after segmental allergen challenge in patients with asthma. *Allergy* 61: 598–604.
32. Sin DD, Man SF, McWilliams A, Lam S (2008) Surfactant protein D and bronchial dysplasia in smokers at high risk of lung cancer. *Chest* 134: 582–588.
33. Honda Y, Takahashi H, Kuroki Y, Akino T, Abe S (1996) Decreased contents of surfactant proteins A and D in BAL fluids of healthy smokers. *Chest* 109: 1006–1009.
34. Lomas DA, Silverman EK, Edwards LD, Locantore NW, Miller BE, et al. (2009) Serum surfactant protein D is steroid sensitive and associated with exacerbations of COPD. *Eur Respir J* 34: 95–102.
35. Takahashi H, Fujishima T, Koba H, Murakami S, Kurokawa K, et al. (2000) Serum surfactant proteins A and D as prognostic factors in idiopathic pulmonary fibrosis and their relationship to disease extent. *Am J Respir Crit Care Med* 162: 1109–1114.
36. Olesen HV, Holmskov U, Schiøtz PO, Sørensen GL (2010) Serum-surfactant SP-D correlates inversely to lung function in cystic fibrosis. *J Cyst Fibros* 9: 257–262.
37. Jounblat R, Clark H, Eggleton P, Hawgood S, Andrew PW, et al. (2005) The role of surfactant protein D in the colonisation of the respiratory tract and onset of bacteraemia during pneumococcal pneumonia. *Respir Res* 6: 126.
38. Giannoni E, Sawa T, Allen L, Wiener-Kronish J, Hawgood S (2006) Surfactant proteins A and D enhance pulmonary clearance of *Pseudomonas aeruginosa*. *Am J Respir Cell Mol Biol* 34: 704–710.
39. Atochina EN, Gow AJ, Beck JM, Haczku A, Inch A, et al. (2004) Delayed clearance of pneumocystis carinii infection, increased inflammation, and altered nitric oxide metabolism in lungs of surfactant protein-D knockout mice. *J Infect Dis* 189: 1528–1539.
40. LeVine AM, Whitsett JA, Hartshorn KL, Crouch EC, Korfhagen TR (2001) Surfactant protein D enhances clearance of influenza A virus from the lung in vivo. *J Immunol* 167: 5868–5873.
41. LeVine AM, Elliott J, Whitsett JA, Srikiatkachorn A, Crouch E, et al. (2004) Surfactant protein-d enhances phagocytosis and pulmonary clearance of respiratory syncytial virus. *Am J Respir Cell Mol Biol* 31: 193–199.
42. Madan T, Reid KB, Clark H, Singh M, Nayak A, et al. (2010) Susceptibility of mice genetically deficient in SP-A or SP-D gene to invasive pulmonary aspergillosis. *Mol Immunol* 47: 1923–1930.
43. Griese M, Wiesener A, Lottspeich F, von Bredow C (2003) Limited proteolysis of surfactant protein D causes a loss of its calcium-dependent lectin functions. *Biochim Biophys Acta* 1638: 157–163.
44. Hirche TO, Crouch EC, Espinola M, Brokelman TJ, Mecham RP, et al. (2004) Neutrophil serine proteinases inactivate surfactant protein D by cleaving within a conserved subregion of the carbohydrate recognition domain. *J Biol Chem* 279: 27688–27698.
45. Alcorn JF, Wright JR (2004) Degradation of pulmonary surfactant protein D by *Pseudomonas aeruginosa* elastase abrogates innate immune function. *J Biol Chem* 279: 30871–30879.
46. Cooley J, McDonald B, Accurso FJ, Crouch EC, Remold-O'Donnell E (2008) Patterns of neutrophil serine protease-dependent cleavage of surfactant protein D in inflammatory lung disease. *J Leukoc Biol* 83: 946–955.
47. Duvoix A, Mackay RM, Henderson N, McGreal E, Postle A, et al. (2011) Physiological concentration of calcium inhibits elastase-induced cleavage of a functional recombinant fragment of surfactant protein D. *Immunobiology* 216: 72–79.
48. Yoshida M, Korfhagen TR, Whitsett JA (2001) Surfactant protein D regulates NF-kappa B and matrix metalloproteinase production in alveolar macrophages via oxidant-sensitive pathways. *J Immunol* 166: 7514–7519.
49. Gaggari A, Hector A, Bratcher PE, Mall MA, Griese M, et al. (2011) The role of matrix metalloproteinases in cystic fibrosis lung disease. *Eur Respir J* 38: 721–727.
50. Kuan SF, Rust K, Crouch E (1992) Interactions of surfactant protein D with bacterial lipopolysaccharides. Surfactant protein D is an *Escherichia coli*-binding protein in bronchoalveolar lavage. *J Clin Invest* 90: 97–106.
51. Davidson J, Kerr A, Guy K, Rotondo D (1998) Prostaglandin and fatty acid modulation of *Escherichia coli* O157 phagocytosis by human monocytic cells. *Immunology* 94: 228–234.
